1 **Title: HIV-1 Vpr accessory protein interacts with REAF and mitigates its associated anti-viral**  
2 **activity.**

3 **Short title: Vpr mitigates REAF**

4  
5 **Authors:** Joseph M Gibbons<sup>1</sup>, Kelly M Marno<sup>1</sup>, Rebecca Pike<sup>1</sup>, Wing-yiu Jason Lee<sup>1</sup>, Christopher  
6 E Jones<sup>1</sup>, B. W. Ogunkolade<sup>1</sup>, Claire Pardieu<sup>1</sup>, Gary Warnes<sup>1</sup>, Paul A Rowley<sup>2</sup>, Richard D Sloan<sup>3,4</sup>  
7 and Áine McKnight<sup>1</sup>

8  
9 **Abstract: The accessory protein Vpr of Human Immunodeficiency Virus type 1 (HIV-1)**  
10 **enhances replication of the virus in macrophages (1-7). Virus particle packaged Vpr is**  
11 **released in target cells shortly after entry, suggesting it is required early in infection (8, 9).**  
12 **Why it is required for infection of macrophages and not cycling T-cells and why it induces**  
13 **G2/M arrest in cycling cells are unknown. Here we observe, by co-immunoprecipitation**  
14 **assay, an interaction between Vpr and endogenous REAF (RNA-associated Early-stage**  
15 **Antiviral Factor, RPRD2), a protein shown previously to potently restrict HIV infection(10).**  
16 **After HIV-1 infects macrophages, within 30 minutes of viral entry, Vpr induces the**  
17 **degradation of REAF. Subsequently, as replication continues, REAF expression is**  
18 **upregulated – a response which is curtailed by Vpr. REAF is more highly expressed in**  
19 **differentiated macrophages than in cycling T-cells. Expression in cycling cells is cell-cycle**  
20 **dependent and knockdown induces cell-cycle perturbation. Therefore, our results support**  
21 **the long held hypothesis that Vpr induces the degradation of a factor involved in the cell**  
22 **cycle that impedes HIV infection in macrophages.**

<sup>1</sup>The Blizard Institute, Queen Mary University of London School of Medicine and Dentistry, QMUL, UK. <sup>2</sup>Department of Biological Sciences, The University of Idaho, Moscow, Idaho, USA. <sup>3</sup>Division of Infection and Pathway Medicine, The University of Edinburgh, UK. <sup>4</sup>ZJU-UoE Institute, Zhejiang University, P.R. China.

## 23 **Summary**

24 Human Immunodeficiency Virus type 1 (HIV-1) has so called accessory proteins which  
25 modulate the activity of host proteins, enabling efficient replication of the virus. The precise  
26 function of one such accessory protein, Vpr, has so far not been revealed. REAF is a host protein  
27 that limits the capacity of HIV-1 to infect cells. Here, we show that Vpr interacts with REAF.  
28 Shortly after infection, only when Vpr is present, REAF is degraded in primary macrophages. Vpr  
29 further curtails the cells subsequent increase in REAF production. Additionally, when the ability  
30 of cell to produce REAF is prevented, the population accumulates in the G2/M phase of the cell  
31 cycle. In infection, Vpr sends cells into G2/M arrest. This study therefore supports the long held  
32 hypothesis that Vpr is responsible for the degradation of a cellular factor involved in the cell cycle  
33 and one which impedes the completion of HIV-1 replication.

34

## 35 **Introduction**

36 Human Immunodeficiency Virus type 1 (HIV-1) infects CD4<sup>+</sup> T-cells and macrophages *in*  
37 *vivo* and causes Acquired Immunodeficiency Syndrome (AIDS). HIV-1 has four non-structural  
38 accessory genes *nef*, *vif*, *vpu* and *vpr* that mitigate host innate immunity. A function for Vpr has  
39 been elusive, but it is required for replication in macrophages and for pathogenesis *in vivo* (1, 2).  
40 Substantial amounts are incorporated into viral particles and released from the major capsid protein  
41 (CA) after entry into the cell (8, 9). Concurrently, reverse transcription transcribes the RNA  
42 genome into DNA, which integrates into the host cell DNA. It is released early from the CA (11)  
43 suggesting it has an early function up to integration. Here we show that within 30 minutes of  
44 cellular entry, Vpr containing virus induces the degradation of RNA-associated Early-stage  
45 Antiviral Factor (REAF, also known as RPRD2). REAF, formerly described as Lv2, limits the

46 completion of pro-viral DNA synthesis and integration (10).

47

## 48 **Results and Discussion**

49 HeLa-CD4, knocked down for REAF (HeLa-CD4 shRNA-REAF, Figure 1A), <sup>10</sup>, were  
50 challenged with HIV-1 89.6<sup>WT</sup> or virus deleted for *vpr* (89.6<sup>Δvpr</sup>), *vif* (89.6<sup>Δvif</sup>) or *vpu* (89.6<sup>Δvpu</sup>).  
51 Figure 1B shows that despite a standard virus input (50 FFU/ml as measured on HeLa-CD4), the  
52 removal of REAF using shRNA alleviates the need for Vpr. There is significantly greater rescue  
53 of HIV-1 89.6<sup>Δvpr</sup> (>60 fold,  $p < 0.0001$ ) compared to HIV-1 89.6<sup>WT</sup> or virus lacking *vpu* or *vif* (20  
54 fold). Thus *vpr* overcomes REAF restriction.

55 REAF is transiently knocked down in HeLa-CD4 shortly after HIV-1 infection (12). Here,  
56 HeLa-CD4 infected with HIV-1 89.6<sup>WT</sup> or HIV-1 89.6<sup>Δvpr</sup> were quantified for REAF nuclear or  
57 cytoplasmic protein over time by imaging flow cytometry. Following infection with HIV-1  
58 89.6<sup>Δvpr</sup>, REAF levels increase in both the nucleus (~25%, Figure 1C) and cytoplasm (~10%,  
59 Figure 1D) within 30 minutes with nuclear levels remaining high for 180 minutes. In the presence  
60 of Vpr (HIV-1 89.6<sup>WT</sup>) however this increase in REAF is curtailed at 30 minutes, with a steady  
61 decline as time progresses. The decline is most marked in the nucleus with ~20% reduction by 60  
62 minutes and ~30% at 120 minutes. By 180 minutes, levels of REAF recover.

63 Imaging flow cytometry software determined the ‘nuclear enrichment score’ over time  
64 after infection with HIV-1 89.6<sup>WT</sup> or HIV-1 89.6<sup>Δvpr</sup> (Figure 1E). The lower the score the less  
65 REAF in the nucleus relative to in the cell overall. By 60-120 minutes, a significant ( $p < 0.05$ )  
66 segregation emerges. In the presence of Vpr, relative nuclear levels of REAF are suppressed  
67 between 30 and 120 minutes ( $p < 0.05$ ). Lower levels of REAF were also observed in the cytoplasm  
68 over time but to a much lesser extent. The virus carries limited quantities of Vpr (11), potentially

69 explaining why REAF levels return to normal or above by 180 minutes. Our results support the  
70 current model for Vpr activity - it interacts with the cullin4A-DDB1 (DCAF1) E3 ubiquitin ligase  
71 and induces proteasomal degradation of an unknown substrate (13). We reported that REAF is  
72 degraded by the proteasome by HIV-1 infection in HeLa-CD4 (12) consistent with these  
73 observations. Furthermore, Figure 1F shows that Vpr and REAF interact with each other, either  
74 directly or as part of a complex, as they are co-immunoprecipitated. This supports our proposition  
75 that Vpr induces the degradation of REAF.

76 Other targets of Vpr have been proposed. It recruits SLX4-SLX1/MUS81-EME1  
77 endonucleases to DCAF1, activating MUS81 degradation and triggering arrest in G2/M (14). It  
78 also degrades helicase-like transcription factor (HLTF) (15). We show here both HLTF (Figure  
79 1G) and MUS81 (Figure 1H) are depleted by virus concomitantly with REAF within 60 minutes  
80 of infection. Interestingly, HLTF and REAF were identified in the same screen for proteins that  
81 interact with single-stranded DNA (16). We previously showed that REAF binds cellular and viral  
82 DNA and viral DNA-containing reverse transcripts (12). The depletion of REAF after infection is  
83 transient, with the recovery by 120 minutes likely reflecting the limited quantities of Vpr carried  
84 in the virus particle(11). In contrast, HLTF and MUS81 levels remain diminished for at least 48  
85 hours suggesting they have a role later in virus life cycle (27, 22). Unlike REAF, neither SLX4-  
86 MUS81-EME1 nor HLTF have so far been directly linked with HIV-1 restriction (17).

87 We defined the cell cycle phase (G1/0, S and G2/M) of primary human monocytes and  
88 analysed REAF expression. Levels are lowest in G1, increase through S phase, and peak in G2/M  
89 (Figure 2A). REAF levels during the cell cycle were further followed after synchronization at the  
90 G2/M border (Figure 2B, Figure S1). When synchronised cells cycled from G2 into M, REAF  
91 levels declined but recovered after 8 hours. The major decline in REAF expression coincides with

92 phosphorylation of histone H3 (Ser10/Thr11), a mitotic cell marker (Figure 2B) (18).

93           Using imaging flow cytometry we further analysed the subcellular localisation of REAF  
94 during mitosis (Figure 2C). An asynchronous population had a nuclear enrichment score of 0.92.  
95 Nocodazole-treated cells diverged into two populations: one with a low score (0.13) and another  
96 with a high score (1.53) (Figure 2C, left). Phospho-histone H3 (Ser28) staining confirmed cells in  
97 mitosis had a low score of 0.17, and thus lower levels of REAF in the nucleus relative to the cell  
98 overall (Figure 2C, right and 2D). Using confocal microscopy, REAF is observed in both the  
99 cytoplasm and nucleus through interphase, prophase and prometaphase but excluded from  
100 chromatin during metaphase, anaphase and telophase (Figure 2E). Furthermore, down modulation  
101 of REAF in HeLa-CD4 shRNA-REAF induces accumulation of cells at G2/M (Figure 2F). Flow  
102 cytometry of DNA content in PI stained cells shows they accumulated (25%) in G2/M compared  
103 to parental (14%).

104           Vpr has been shown to varying degrees to be more beneficial for replication in  
105 macrophages than in cycling T-cells (3-7). We compared the susceptibility of mitotic HeLa-CD4  
106 (92.5%) to an asynchronous population (2.6% mitotic, Figure 3A) using HIV-1 89.6 (VSV-G) with  
107 a GFP reporter as challenge virus. Mitotic cells were 12 fold more susceptible (Figure 3B). This  
108 was confirmed using HIV-1 89.6<sup>WT</sup> expressing HIV-1 envelope (Figure S2). Thus REAF exclusion  
109 from chromatin during mitosis may provide an opportunity to evade restriction in cycling T-cells.  
110 The results concur with previous reports suggesting cell cycle arrest in G2/M promotes early HIV-  
111 1 infection (19) and that there is delayed replication kinetics of *vpr* mutants in T-cells (20). Figure  
112 1 C-D above suggested that nuclear intensity of REAF is key to HIV restriction. We measured  
113 expression of REAF in the nucleus of resting or activated CD4<sup>+</sup> T-cells, monocytes or  
114 macrophages and dendritic cells (DC) (Figure 3C). Expression levels are higher in MDMs

115 compared to T-cells again concurring with the need for HIV-1 Vpr to infect macrophages but not  
116 T-cells. The differential expression of REAF protein in monocytes and MDMs was confirmed by  
117 Western blotting (Figure 3D).

118 Antiviral factors are often upregulated in response to pathogen associated molecular  
119 patterns. Polyriboinosinic:polyribocytidylic acid (poly(I:C)) is a double-stranded RNA, used to  
120 stimulate viral infection associated molecular pattern recognition pathways. Figure 3E shows  
121 poly(I:C) induction of REAF in THP-1, a macrophage cell line.

122 To decipher a role for Vpr and REAF in primary macrophages, MDMs were challenged  
123 with either HIV-1 89.6<sup>WT</sup> or HIV-1 89.6<sup>Δvpr</sup>. Western blot analysis shows that REAF levels decline  
124 within 30 and up to 60 minutes of challenge with HIV-1 89.6<sup>WT</sup> (Figure 3F). Basal levels return  
125 by 240 minutes. This contrasts with HIV-1 89.6<sup>Δvpr</sup> infection where REAF levels do not decline  
126 and indeed rise from 60 to 240 minutes (Figure 3G). Thus, MDMs respond to HIV-1 infection by  
127 upregulating REAF, but Vpr mitigates this by inducing REAF's degradation.

128 The subcellular fluctuation of REAF levels in MDMs after challenge with HIV-1 89.6<sup>WT</sup>  
129 or HIV-1 89.6<sup>Δvpr</sup> was determined using imaging flow cytometry. With Vpr, nuclear REAF  
130 decreases between 60 and 120 minutes ( $P < 0.05$ , Figure 3H), similar to HeLa-CD4. In contrast,  
131 without vpr, nuclear REAF increases at 120 minutes (~25%). Similar to the response to poly(I:C)  
132 in THP-1, cytoplasmic REAF expression increases within 30 minutes of infection with either virus  
133 (Figure 3I). Interestingly REAF cytoplasmic upregulation was even greater for HIV-1 89.6<sup>WT</sup> than  
134 for the mutant virus without Vpr possibly reflecting exclusion from the nucleus. These results  
135 support the proposition that Vpr overcomes REAF restriction in MDMs where REAF expression  
136 is high and is induced further by viral replication. Figure 3J confirms that the HIV-1 89.6<sup>Δvpr</sup> virus  
137 used in these experiments is restricted to replication in MDMs when compared with the wild type

138 virus expressing Vpr (HIV-1 89.6<sup>WT</sup>).

139 REAF has many properties of restriction factors (21, 22). It interacts with HIV-1 reverse  
140 transcripts, impeding reverse transcription and integration (12). It is germline encoded,  
141 constitutively expressed in cells, regulated by the proteasome system, suppressed by Vpr and  
142 upregulated by poly(I:C).

143 IFN $\alpha$  induces many HIV restriction factors (23, 24). We used RNA-Seq to determine if  
144 IFN $\alpha$  upregulated REAF mRNA in MDMs. Figure 4A shows IFN $\alpha$  induced upregulation of  
145 antiviral genes, including HIV restriction factors APOBEC3G, IFITM1-3, MX2, tetherin and  
146 Viperin (21) but with little or no upregulation of REAF mRNA. Further, there was no change in  
147 either subcellular distribution or overall levels by Western blotting or image flow cytometry (a  
148 slight increase by Western blotting was observed in some donors, Figure S3). Nor was REAF  
149 mRNA or protein upregulated in CD4<sup>+</sup> T-cells (Figure S4) or in THP-1 in response to IFN  $\alpha$ ,  $\beta$ , or  
150  $\gamma$  (Figure S5).

151 Restriction factors are often under evolutionary positive selection at sites that interact with  
152 virus. We found no evidence of positive selection of REAF in the primate lineage (Figure 4B) and  
153 so it fits better with a model of purifying selection. This could reflect a role in G2/M progression,  
154 precluding changes to its primary sequence. REAF is unlike the evolving HIV restriction factors  
155 like APOBEC3G, SAMHD1, TRIM5 or BST2/tetherin and is more similar to SERINC3 and 5  
156 which are not under positive selection (25, 26). We propose that REAF is a multi-functional  
157 or 'moonlighting' protein with at least two cellular roles (27). In cycling T-cells, REAF is  
158 associated with G2/M transition, so depletion of it by Vpr induces an accumulation in G2/M. In  
159 non-cycling cells, Vpr is important for HIV infection of macrophages where REAF is highly  
160 expressed.

161 **Materials and methods:**

162

163 **Ethics Statement**

164 Leucocyte cones from blood donors, from which PBMCs were isolated, were obtained from the  
165 NHS Blood Transfusion service, St. George's Hospital, London. Donors were anonymous and thus  
166 patient consent was not required. The local ethical approval reference number is 06/Q0603/59.

167

168 **Cell lines**

169 HEK-293T (ATCC), THP-1, C8166, HeLa-CD4 parental (all NIBSC AIDS Reagents) and  
170 shRNA-REAF (HeLa-CD4 shRNA-REAF, previously described) were maintained at 37°C in 5%  
171 CO<sub>2</sub> (10). Cells were grown in Dulbecco's Modified Eagle Medium (DMEM, ThermoFisher)  
172 supplemented with fetal bovine serum (5-10%, Thermo Fisher) and appropriate antibiotics. HeLa-  
173 CD4-shRNA-REAF were selected for resistance to puromycin in media supplemented with  
174 10µg/ml puromycin.

175

176 **Transfections and virus production**

177 The infectious molecular clone for HIV-1 89.6 was obtained from the Centre for AIDS Research  
178 (NIBSC, UK). Infectious full-length and chimeric HIV clones were prepared by linear  
179 polyethylenimine 25K (Polysciences), Lipofectamine 2000 (Invitrogen) or Lipofectamine 3000  
180 (Invitrogen) transfection of HEK-293T. Plasmid constructs HIV-1 89.6<sup>Δvif</sup>, HIV-1 89.6<sup>Δvpr</sup> and  
181 HIV-1 89.6<sup>Δvpu</sup> were generated from the HIV-1 89.6 molecular clone, using overlap extension PCR  
182 (24). Clones were confirmed by plasmid sequencing (Source BioScience). Primer sequences are  
183 available on request.



184

185 HEK-293T were plated at  $2 \times 10^4/\text{cm}^2$  in 8-well chamber slides (confocal microscopy), or 10cm  
186 dishes (virus production) 48 hours prior to transfection. For virus production, supernatant was  
187 harvested 72 hours post-transfection and cleared of cell debris by centrifugation at  $500 \times g$  for 5  
188 minutes before storage at  $-80^\circ\text{C}$ . Mutant virus with low titer were amplified by C8166 for 48 hours  
189 before harvesting. HIV-1 89.6 (VSV-G) was generated by combining the transfer vector pCSGW  
190 with the envelope pMDG VSV-G and the core construct p8.91-89.6gag in HEK-293T as above  
191 and has been previously described (12).

192

### 193 **Titration of replication competent virus**

194 HeLa-CD4 were seeded at  $1.5 \times 10^4$  cells/well in 48-well plates to form an adherent monolayer of  
195 cells. Cell monolayers were challenged with serial 1/5 dilutions of virus and titre was assessed  
196 after 48 hours by *in situ* intracellular staining of HIV-1 p24 to identify individual foci of viral  
197 replication (FFU), as described previously (12). For infection time course experiments, 400-500 $\mu\text{l}$   
198 of  $1 \times 10^5$  FFU/ml (HeLa-CD4) or  $3 \times 10^3$  FFU/ml (MDMs) virus was added per well to cells  
199 cultured in 6-well trays for 24 hours (HeLa-CD4) or 7 days (for MDMs). In Figure 3J, cells were  
200 challenged with 50ng p24 in 6-well plates with  $2 \times 10^6$  MDMs per well. Supernatants were  
201 harvested on days 0, 2, 8, 21 and 28 post challenge and p24 concentration analysed by ELISA.

202

### 203 **cDNA synthesis and qPCR**

204 Total RNA was extracted from MDMs using an RNeasy Plant Mini Kit (QIAGEN), and cDNA  
205 was synthesised with SuperScript™ III First-Strand Synthesis System (Invitrogen), according to  
206 manufacturer's instructions. cDNA was subjected to real-time quantitative PCR (qPCR) using

207 REAF, OAS1 and  $\beta$ -actin primer pairs with SYBR<sup>®</sup> Green detection of amplified transcripts  
208 (QuantiTect SYBR Green PCR Kit, QIAGEN). Data acquisition and analysis were performed  
209 using the ABI PRISM<sup>™</sup> 7500 SDS software. Primer sequences are available upon request.

210

### 211 **Gene expression microarray**

212 Prior to microarray analysis, MDM RNA was prepared using the Illumina<sup>™</sup> TotalPrep<sup>™</sup> RNA  
213 Amplification Kit (Ambion), according to manufacturer's instructions. The probes were  
214 hybridised on an Illumina<sup>™</sup> HT12v3 bead array following the manufacturer's standard  
215 hybridisation and scanning protocols. Raw measurements were processed by GenomeStudio  
216 software (Illumina), and quantile normalised. All microarray data are publicly available in the  
217 Gene Expression Omnibus (GEO) database with accession number GSE54455.

218

### 219 **IFN, Poly(I:C) and treatment**

220 MDMs, CD4<sup>+</sup> T-cells and THP-1 were treated with IFN (100-500IU/ml, specified) for 24 or 48  
221 hours (specified) before harvest for RNA extraction; analysis by Western blotting or imaging flow  
222 cytometry. THP-1 were treated with poly(I:C) (25 $\mu$ g/ml, HMW/LyoVec<sup>™</sup>, Invitrogen) for 48  
223 hours before analysis by Western blotting or imaging flow cytometry. Prior to IFN or poly(I:C)  
224 treatment, THP-1 were treated with phorbol 12-myristate 13-acetate (PMA, 62 ng/ml) for 3 days  
225 and then PMA-free DMEM for 2 days to allow differentiation and recovery. For Figure 4B and  
226 Figure S4, recombinant IFN $\alpha$  was purchased from Sigma (Interferon- $\alpha$ A/D human Cat. No. I4401-  
227 100KU) and is a combination of human subtypes 1 and 2. For Figure S3 and 5, recombinant human  
228 IFNs are from Peptotech.

229

230 **Western blotting**

231 Cells were harvested and lysed in 30-50 $\mu$ l of radioimmunoprecipitation (RIPA) buffer  
232 supplemented with NaF (5 $\mu$ M), Na<sub>2</sub>VO<sub>3</sub> (5 $\mu$ M),  $\beta$ -glycerophosphate (5 $\mu$ M) and 1x Protease  
233 Inhibitor Cocktail (Cytoskeleton). The protein concentration of each sample was determined using  
234 the BCA Protein Assay Kit (Pierce). 25 $\mu$ g or 12.5 $\mu$ g of total protein was separated by SDS-PAGE  
235 (4-12% Bis-Tris Gel, Invitrogen), at 130V for 1 hour 30 minutes in MOPS SDS Running Buffer  
236 (Invitrogen). Separated proteins were transferred onto nitrocellulose membrane (0.45 $\mu$ m pore size,  
237 GE Healthcare) at 45V for 2 hours, in ice-cold NuPAGE™ Transfer Buffer (ThermoFisher).  
238 Membranes were blocked for 1 hour at room temperature in 5% (w/v) non-fat milk powder in  
239 TBST buffer. Specific proteins were detected with primary antibodies by incubation with  
240 membranes overnight at 4<sup>0</sup>C and with secondary antibodies for 1 hour at room temperature. All  
241 antibodies were diluted in blocking buffer. Proteins were visualised using ECL Prime Western  
242 Blotting Detection Reagent (GE Healthcare) and imaged using either ChemiDoc Gel Imaging  
243 System (Bio-Rad) or exposed to CL-XPosure films (ThermoScientific) and developed.

244

245 **Antibodies**

246 Primary rabbit polyclonal antibody to REAF (RbpAb-RPRD2) has been previously described (12).  
247 For imaging flow cytometry and confocal microscopy, RbpAb-RPRD2 was detected using goat  
248 anti-rabbit IgG conjugated with Alexa Fluor 647 (Invitrogen). FITC-labelled anti-phospho-histone  
249 H3 (Ser28) was used (BD Bioscience) for imaging flow cytometry and confocal microscopy.  
250 MsmAb-IFITM1 (clone 5B5E2, Proteintech), was detected by goat anti-mouse IgG Alexa Fluor  
251 555 (ThermoFisher) for imaging flow cytometry, and by anti-mouse IgG antibody conjugated to  
252 HRP (GE Healthcare) for Western blotting, as were MsmAb-Mus81 and MsmAb-GFP (both

253 Abcam). Also for Western blotting, RbpAb-RPRD2, RbmAb-IFITM3 (EPR5242, Insight  
254 Biotechnology), RbpAb-GAPDH, RbpAb- $\beta$ Actin, RbmAb-phospho-histone H3 (Ser10/Thr11)  
255 and RbpAb-HLTF (all Abcam) were detected with secondary antibody: donkey anti-rabbit IgG  
256 conjugated to HRP (GE Healthcare).

257

258

### 259 **Immunoprecipitation**

260 HEK-293T, transfected with either VPR-GFP or GFP control expression vector, were lysed 72hrs  
261 post transfection in RIPA buffer supplemented with NaF (5 $\mu$ M), Na<sub>2</sub>VO<sub>3</sub> (5 $\mu$ M),  $\beta$ -  
262 glycerophosphate (5 $\mu$ M) and 1x Protease Inhibitor Cocktail (Cytoskeleton). Total protein  
263 concentration was determined using BCA Protein Assay Kit (Pierce). GFP-TRAP<sup>®</sup> magnetic  
264 agarose beads were equilibrated in ice cold dilution buffer (10 mM Tris/Cl pH 7.5; 150 mM NaCl;  
265 0.5 mM EDTA) according to manufacturer's instructions (Chromotek). Cell lysates containing  
266 100 $\mu$ g of total protein were incubated with 10 $\mu$ l of equilibrated beads for 2 hours at 4°C with  
267 gentle agitation. Beads were washed three times with PBST buffer before analysis by Western  
268 blotting.

269

### 270 **Magnetic separation of primary human lymphocytes**

271 Peripheral blood mononuclear cells (PBMCs) were isolated from leukocyte cones (NHS Blood  
272 Transfusion service, St. George's Hospital, London) by density gradient centrifugation with  
273 Lymphoprep<sup>™</sup> density gradient medium (STEMCELL<sup>™</sup> Technologies). Peripheral monocytes  
274 were isolated from PBMCs, using the human CD14<sup>+</sup> magnetic beads (Miltenyi Biotech) according  
275 to manufacturer's instructions. CD4<sup>+</sup> T-cells were isolated from the flow-through, using the human

276 CD4<sup>+</sup> T-cell isolation kit (Miltenyi Biotech). CD14<sup>+</sup> monocytes, and CD4<sup>+</sup> T-cells were either  
277 differentiated, or fixed directly after isolation for intracellular staining. To obtain M1 and M2  
278 macrophages (M1/M2 MDMs), monocytes were treated with either granulocyte-macrophage  
279 colony stimulating factor (GM-CSF, 100ng/ml, Peprotech) or macrophage colony stimulating  
280 factor (M-CSF, 100ng/ml) for 7 days, with medium replenished on day 4. To obtain dendritic cells  
281 (DC), monocytes were treated with GM-CSF (50ng/ml) and IL-4 (50ng/ml) for 7 days, with  
282 medium replenished on day 4. Activated CD4<sup>+</sup> T-cells were obtained by stimulating freshly  
283 isolated CD4<sup>+</sup> T-cells at  $1 \times 10^6$ /ml with T cell activator CD3/CD28 Dynabeads (ThermoFisher), at  
284 a bead-cell-ratio of 1, for 7 days. Magnetic beads were removed prior to intracellular staining and  
285 flow cytometry.

286

## 287 **Immunofluorescence**

288 Transfected cells were washed with PBS and fixed in 2% paraformaldehyde/PBS for 10 minutes,  
289 at room temperature. Fixed cells were then permeabilised in 0.2% Triton-X100/PBS for 20  
290 minutes, at room temperature. Cells were incubated with primary antibodies in PBS containing  
291 0.1% Triton-X100 and 2% BSA overnight at 4<sup>0</sup>C. After 3 washes in PBS, cells were then labeled  
292 with secondary antibodies in the same buffer for 1 hour, at room temperature, and washed 3 times  
293 with PBS. For confocal microscopy, nuclei were counterstained with Hoechst 33342 (2 $\mu$ M,  
294 ThermoFisher) for 5 minutes, at room temperature. Labeled cells were mounted with ProLong<sup>TM</sup>  
295 Diamond Antifade Mountant (ThermoFisher) and analysed on a laser scanning confocal  
296 microscope LSM 710 (Carl Zeiss). Images were acquired with ZEN software and analysed with  
297 ImageJ.

298

## 299 **Imaging flow cytometry**

300 Cells were fixed in FIX&PERM<sup>®</sup> Solution A (Nordic MUBio) for 30 minutes, and permeabilised  
301 with 0.2% Triton<sup>™</sup>-X 100/PBS. MDMs were blocked with human serum (1%). The staining buffer  
302 used was: 0.1% Triton<sup>™</sup>-X 100 0.5% FCS. Nuclei were stained with DAPI (1µg/ml) for two hours.  
303 Imaging flow cytometry was performed using the Amnis ImageStream<sup>®x</sup> Mark II Flow Cytometer  
304 (Merck) and INSPIRE<sup>®</sup> software (Amnis). A minimum of 10,000 events were collected for each  
305 sample, gating strategy is shown in Figure S6. IDEAS<sup>®</sup> software (Amnis) was used for analysis  
306 and to determine the ‘nuclear enrichment score’. The nuclear enrichment score is a comparison of  
307 the intensity of REAF fluorescence inside the nucleus to the total fluorescence intensity of the  
308 entire cell. A lower nuclear enrichment score indicates a lower proportion of overall REAF is  
309 located within the nucleus.

310

## 311 **Statistics**

312 Statistical significance in all experiments was calculated by Student’s t-test (two tailed). Data are  
313 represented as mean ± standard deviation (error bars). GraphPad Prism and Excel were used for  
314 calculation and illustration of graphs.

315

## 316 **Cell synchronisation**

317 HeLa-CD4 were synchronised at the G2/M border by nocodazole (200ng/ml) for 16 hours. Where  
318 synchronised cells were infected with virus, an initial S phase block with thymidine (4mM) was  
319 induced for 24 hours followed by a PBS wash and a treatment with nocodazole (100ng/ml) for a  
320 further 16 hours. Collecting only those cells that were in suspension, as well as those that detached  
321 easily with a manual “shake-off”, enriched the population of mitotic cells.

322

### 323 **Cell cycle analysis**

324 Cell cycle phase distribution was determined by analysis of DNA content via either flow cytometry  
325 (BD FACS Canto™ II) or imaging flow cytometry. Cells were fixed in ice-cold ethanol (70%),  
326 treated with ribonuclease A (100µg/ml) and stained with propidium iodide (PI, 50µg/ml) or fixed  
327 in FIX&PERM® Solution A (Nordic MUBio) and stained with DAPI (1µg/ml). Mitotic cells were  
328 also identified by flow cytometry using the anti-phospho-histone H3 (Ser28) antibody. Cell lysates  
329 were assessed by Western blotting using the anti-phospho-histone H3 (Ser10/Thr11) antibody as  
330 an additional mitotic marker. Chromatin morphology and anti-phospho-histone H3 (Ser28) were  
331 used to determine the cells in indicated phases of the cell cycle and mitosis in confocal microscopy  
332 experiments.

333

### 334 **Evolutionary analysis**

335 To ascertain the evolutionary trajectory of REAF, we analysed DNA sequence alignments of  
336 REAF from 15 species of extant primates using codeml (as implemented by PAML 4.2) (28). The  
337 evolution of REAF was compared to several NSsites models of selection, M1, M7 and M8a  
338 (neutral models with site classes of dN/dS <1 or ≤1) and M2, M8 (positive selection models  
339 allowing an additional site class with dN/dS >1). Two models of codon frequencies (F61 and F3x4)  
340 and two different seed values for dN/dS ( $\omega$ ) were used in the maximum likelihood simulations.  
341 Likelihood ratio tests were performed to evaluate which model of evolution the data fit  
342 significantly better. The p-value indicates the confidence with which the null model (M1, M7,  
343 M8a) can be rejected in favor of the model of positive selection (M2, M8). The alignment of REAF  
344 was analysed by GARD to confirm the lack recombination during REAF evolution (29). Neither

345 positively selected sites nor signatures of episodic diversifying selection were detected within  
346 REAF by additional evolutionary analysis by REL and FEL or MEME (30).

347

#### 348 **Data availability**

349 All microarray data is available in the gene expression omnibus (GEO) database with accession  
350 number GSE54455.

351

352

353

354

355

356

357

358

359

360

361

362

363

364

365

366

367

368

369



370 **References (1-30):**

371

- 372 1. Eckstein DA, Sherman MP, Penn ML, Chin PS, De Noronha CM, Greene WC, et al.  
373 HIV-1 Vpr enhances viral burden by facilitating infection of tissue macrophages but not  
374 nondividing CD4+ T cells. *J Exp Med*. 2001;194(10):1407-19.
- 375 2. Malim MH, Emerman M. HIV-1 accessory proteins--ensuring viral survival in a hostile  
376 environment. *Cell Host Microbe*. 2008;3(6):388-98.
- 377 3. Connor RI, Chen BK, Choe S, Landau NR. Vpr is required for efficient replication of  
378 human immunodeficiency virus type-1 in mononuclear phagocytes. *Virology*. 1995;206(2):935-  
379 44.
- 380 4. Heinzinger NK, Bukrinsky MI, Haggerty SA, Ragland AM, Kewalramani V, Lee MA, et  
381 al. The Vpr protein of human immunodeficiency virus type 1 influences nuclear localization of  
382 viral nucleic acids in nondividing host cells. *Proc Natl Acad Sci U S A*. 1994;91(15):7311-5.
- 383 5. Vodicka MA, Koepp DM, Silver PA, Emerman M. HIV-1 Vpr interacts with the nuclear  
384 transport pathway to promote macrophage infection. *Genes Dev*. 1998;12(2):175-85.
- 385 6. Balliet JW, Kolson DL, Eiger G, Kim FM, McGann KA, Srinivasan A. Distinct effects in  
386 primary macrophages and lymphocytes of the human immunodeficiency virus type 1 accessory  
387 genes vpr, vpu, and nef: mutational analysis of a primary HIV-1 isolate. *Virology*. 1994;200.
- 388 7. Chen R, Le Rouzic E, Kearney JA, Mansky LM, Benichou S. Vpr-mediated  
389 incorporation of UNG2 into HIV-1 particles is required to modulate the virus mutation rate and  
390 for replication in macrophages. *J Biol Chem*. 2004;279(27):28419-25.
- 391 8. Cohen EA, Terwilliger EF, Jalinoos Y, Proulx J, Sodroski JG, Haseltine WA.  
392 Identification of HIV-1 vpr product and function. *J Acquir Immune Defic Syndr*. 1990;3(1):11-8.
- 393 9. Bachand F, Yao XJ, Hrimech M, Rougeau N, Cohen EA. Incorporation of Vpr into  
394 human immunodeficiency virus type 1 requires a direct interaction with the p6 domain of the p55  
395 gag precursor. *J Biol Chem*. 1999;274(13):9083-91.
- 396 10. Marno KM, O'Sullivan E, Jones CE, Diaz-Delfin J, Pardieu C, Sloan RD, et al. RNA-  
397 Associated Early-Stage Antiviral Factor Is a Major Component of Lv2 Restriction. *J Virol*.  
398 2017;91(10).
- 399 11. Desai TM, Marin M, Sood C, Shi J, Nawaz F, Aiken C, et al. Fluorescent protein-tagged  
400 Vpr dissociates from HIV-1 core after viral fusion and rapidly enters the cell nucleus.  
401 *Retrovirology*. 2015;12:88.
- 402 12. Marno KM, Ogunkolade BW, Pade C, Oliveira NM, O'Sullivan E, McKnight A. Novel  
403 restriction factor RNA-associated early-stage anti-viral factor (REAF) inhibits human and simian  
404 immunodeficiency viruses. *Retrovirology*. 2014;11:3.
- 405 13. Romani B, Cohen EA. Lentivirus Vpr and Vpx accessory proteins usurp the cullin4-  
406 DDB1 (DCAF1) E3 ubiquitin ligase. *Curr Opin Virol*. 2012;2(6):755-63.
- 407 14. Laguette N, Bregnard C, Hue P, Basbous J, Yatim A, Larroque M, et al. Premature  
408 activation of the SLX4 complex by Vpr promotes G2/M arrest and escape from innate immune  
409 sensing. *Cell*. 2014;156(1-2):134-45.
- 410 15. Lahouassa H, Blondot ML, Chauveau L, Chougui G, Morel M, Leduc M, et al. HIV-1  
411 Vpr degrades the HLTF DNA translocase in T cells and macrophages. *Proc Natl Acad Sci U S*  
412 *A*. 2016;113(19):5311-6.

- 413 16. Marechal A, Li JM, Ji XY, Wu CS, Yazinski SA, Nguyen HD, et al. PRP19 transforms  
414 into a sensor of RPA-ssDNA after DNA damage and drives ATR activation via a ubiquitin-  
415 mediated circuitry. *Mol Cell*. 2014;53(2):235-46.
- 416 17. Helmer RA, Martinez-Zaguilan R, Dertien JS, Fulford C, Foreman O, Peiris V, et al.  
417 Helicase-like transcription factor (Hltf) regulates G2/M transition, Wt1/Gata4/Hif-1a cardiac  
418 transcription networks, and collagen biogenesis. *PLoS One*. 2013;8(11):e80461.
- 419 18. Wei Y, Yu L, Bowen J, Gorovsky MA, Allis CD. Phosphorylation of histone H3 is  
420 required for proper chromosome condensation and segregation. *Cell*. 1999;97(1):99-109.
- 421 19. Groschel B, Bushman F. Cell cycle arrest in G2/M promotes early steps of infection by  
422 human immunodeficiency virus. *J Virol*. 2005;79(9):5695-704.
- 423 20. Balliet JW, Kolson DL, Eiger G, Kim FM, McGann KA, Srinivasan A, et al. Distinct  
424 effects in primary macrophages and lymphocytes of the human immunodeficiency virus type 1  
425 accessory genes vpr, vpu, and nef: mutational analysis of a primary HIV-1 isolate. *Virology*.  
426 1994;200(2):623-31.
- 427 21. Doyle T, Goujon C, Malim MH. HIV-1 and interferons: who's interfering with whom?  
428 *Nat Rev Microbiol*. 2015;13(7):403-13.
- 429 22. Kluge SF, Sauter D, Kirchhoff F. SnapShot: antiviral restriction factors. *Cell*.  
430 2015;163(3):774- e1.
- 431 23. Goujon C, Malim MH. Characterization of the alpha interferon-induced postentry block  
432 to HIV-1 infection in primary human macrophages and T cells. *J Virol*. 2010;84(18):9254-66.
- 433 24. Cheney KM, McKnight A. Interferon-alpha mediates restriction of human  
434 immunodeficiency virus type-1 replication in primary human macrophages at an early stage of  
435 replication. *PLoS One*. 2010;5(10):e13521.
- 436 25. McLaren PJ, Gawanbacht A, Pyndiah N, Krapp C, Hotter D, Kluge SF, et al.  
437 Identification of potential HIV restriction factors by combining evolutionary genomic signatures  
438 with functional analyses. *Retrovirology*. 2015;12:41.
- 439 26. Murrell B, Vollbrecht T, Guatelli J, Wertheim JO. The Evolutionary Histories of  
440 Antiretroviral Proteins SERINC3 and SERINC5 Do Not Support an Evolutionary Arms Race in  
441 Primates. *J Virol*. 2016;90(18):8085-9.
- 442 27. Jeffery CJ. An introduction to protein moonlighting. *Biochem Soc Trans*.  
443 2014;42(6):1679-83.
- 444 28. Yang Z. PAML 4: phylogenetic analysis by maximum likelihood. *Mol Biol Evol*.  
445 2007;24(8):1586-91.
- 446 29. Kosakovskiy SL, Posada D, Gravenor MB, Woelk CH, Frost SD. GARD: a genetic  
447 algorithm for recombination detection. *Bioinformatics*. 2006;22(24):3096-8.
- 448 30. Pond SL, Frost SD. Datamonkey: rapid detection of selective pressure on individual sites  
449 of codon alignments. *Bioinformatics*. 2005;21(10):2531-3.

450

451

452

453

454

455 **Acknowledgements:** The monoclonal antibodies to HIV-1 p24 (EVA365 and 366) were provided  
456 by the EU Programme EVA Centre for AIDS Reagents, NIBSC, UK (AVIP Contract Number  
457 LSHP-CT-2004-503487). We thank Paul Clapham, Robin Weiss and Ari Fasatti for critical review  
458 of the manuscript.

459

460

461

462

463

464

465

466

467

**Figure 1:**

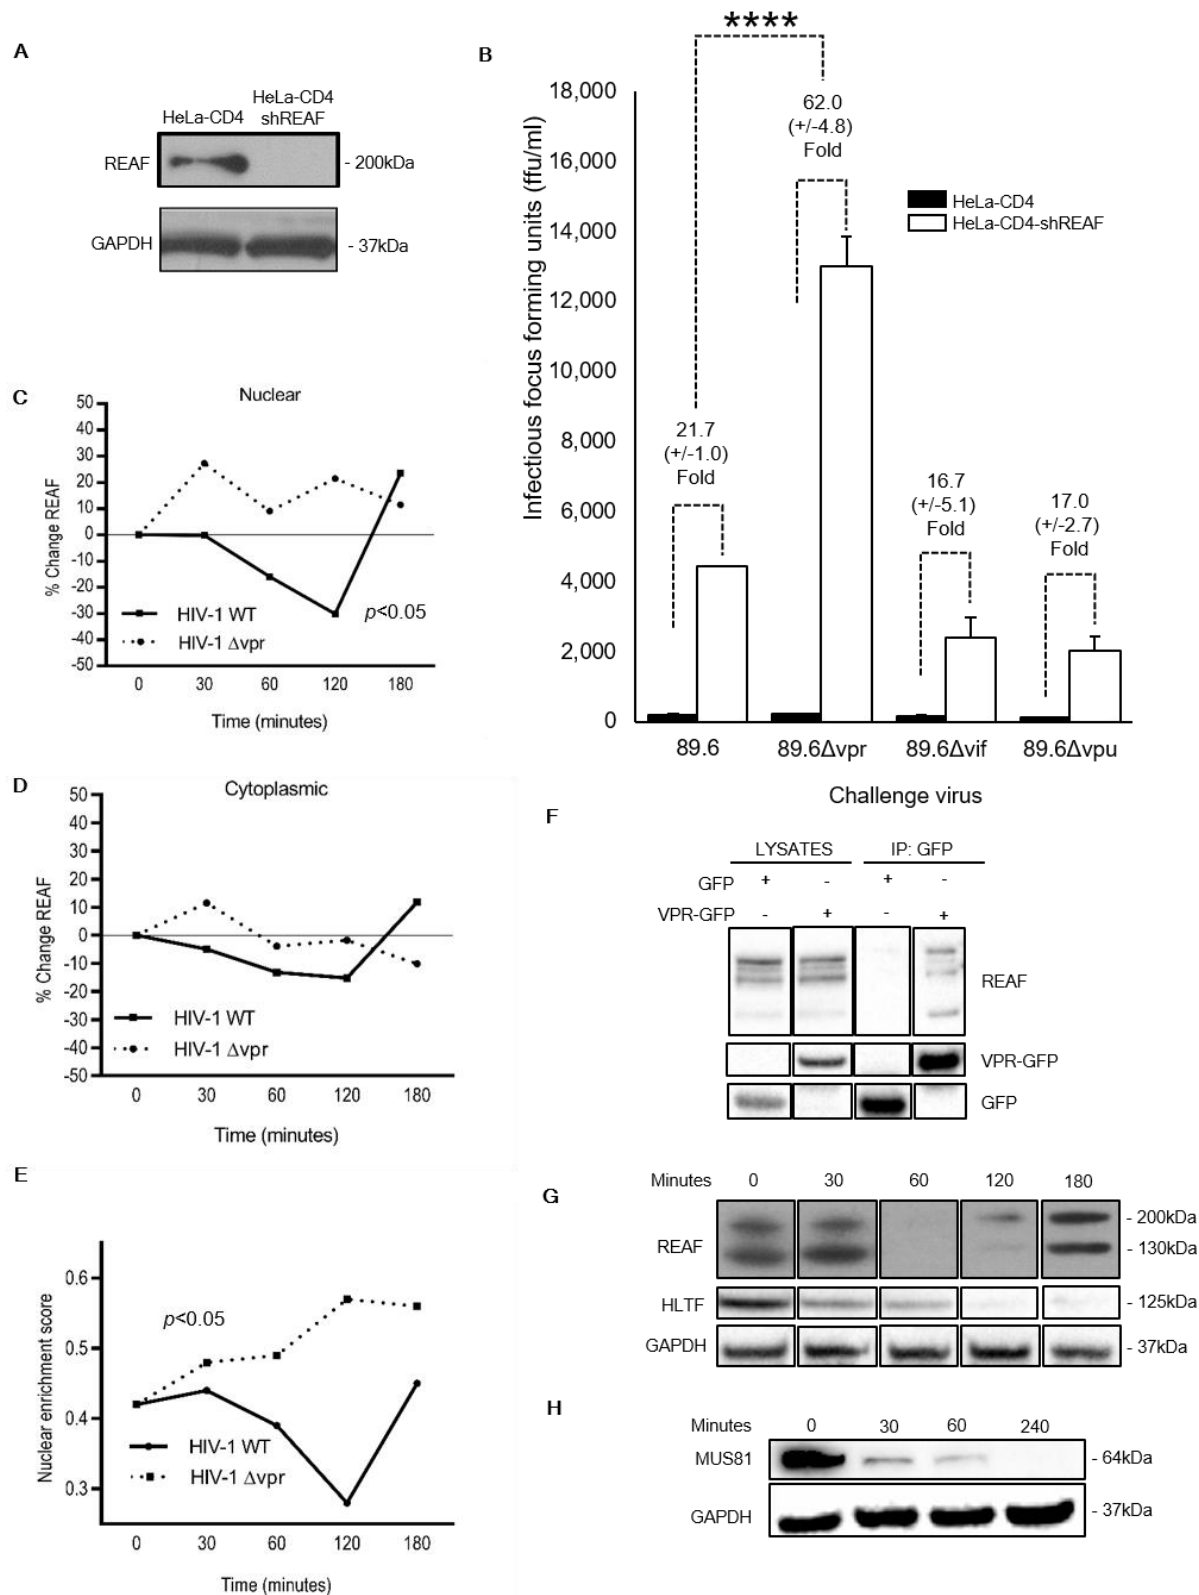

469

470

**Figure 1: HIV-1 Vpr interacts with REAF and overcomes restriction.** (A) REAF protein in HeLa-CD4 parental and HeLa-CD4 expressing shRNA targeting REAF (HeLa-CD4 shRNA-REAF). GAPDH is a loading control. (B) HeLa-CD4 shRNA-REAF challenged with HIV-1 89.6<sup>WT</sup> or mutants HIV-1 89.6 <sup>$\Delta$ vpr</sup>,  <sup>$\Delta$ vif</sup> or  <sup>$\Delta$ vpu</sup>. HIV-1 89.6 <sup>$\Delta$ vpr</sup> is >60 fold more sensitive to REAF restriction than HIV-1 89.6<sup>WT</sup> or other mutants. Input of approximately 50 FFU/ml on HeLa-CD4. Error bars indicate standard deviation and asterix indicate statistical significance (\*\*\*\*= $p$ <0.0001, Student's t-test). (C-E) Imaging flow cytometry measured mean fluorescence intensity (MFI) of REAF in the nucleus (C) and cytoplasm (D) of HeLa-CD4 over time after challenge with HIV-1 89.6<sup>WT</sup> or HIV-1 89.6 <sup>$\Delta$ vpr</sup>. Results are representative of three separate experiments. A lower nuclear enrichment score (E) indicates a lower proportion of overall REAF is located in the nucleus ( $p$ <0.05). Statistical significance was calculated by Student's t-test. (F) Co-immunoprecipitated REAF was detected by Western blotting of VPR-GFP IP (right) but not GFP control IP (left). (G) Western blotting of REAF and HLTF in THP-1 over time post challenge with HIV-1 89.6<sup>WT</sup>. GAPDH is a loading control. (H) Western blotting of MUS81 in HeLa-CD4 over time post challenge with HIV-1 89.1<sup>WT</sup>. GAPDH is a loading control.

471

472

473

474

475

476

**Figure 2:**

477

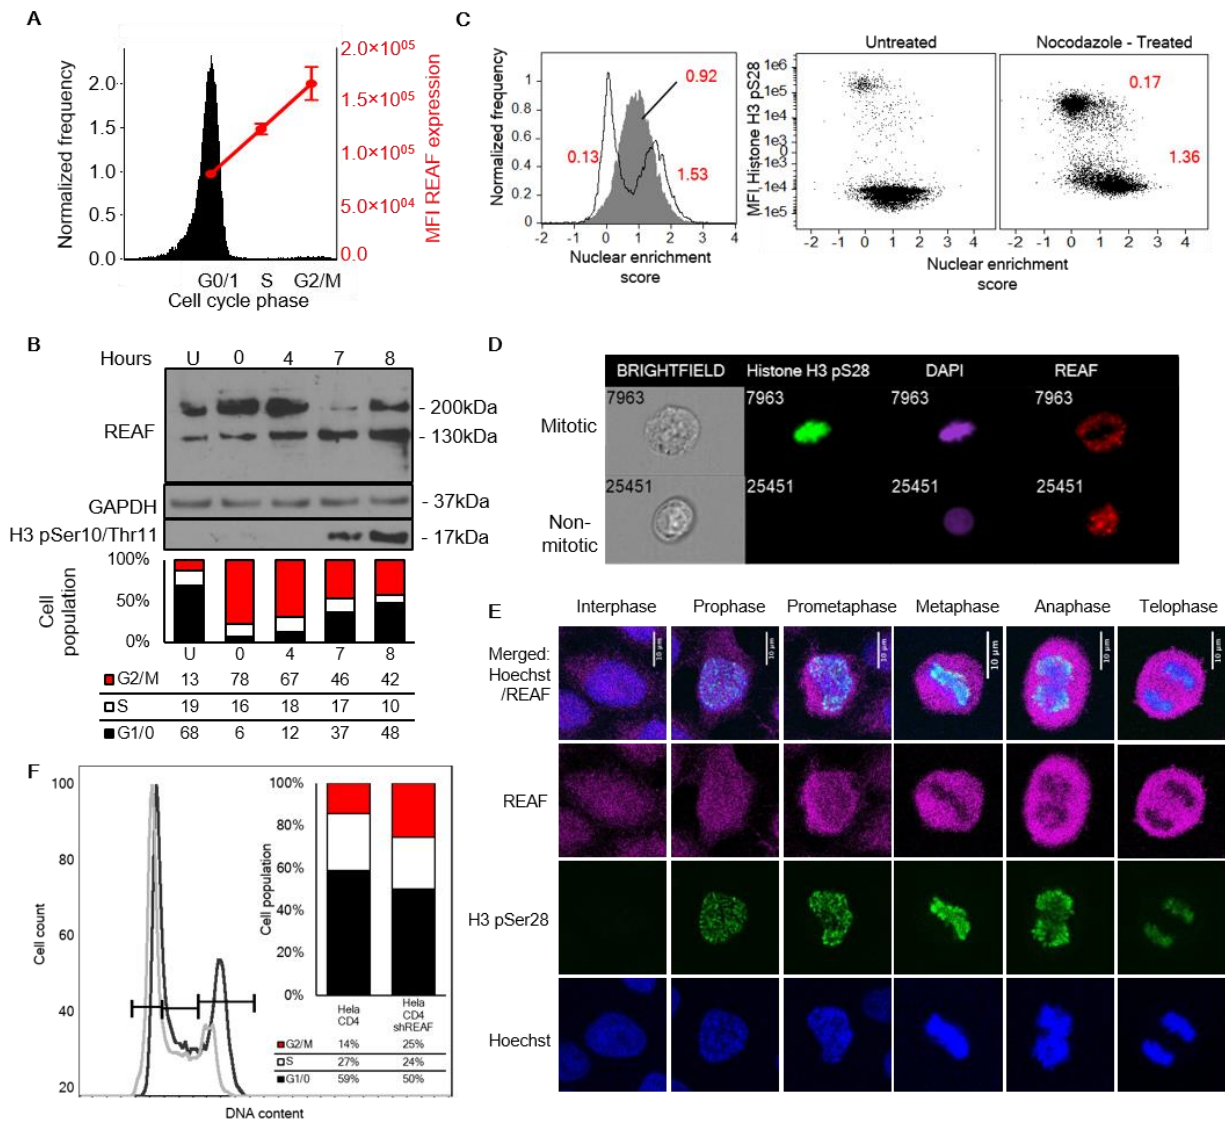

478

479

480

481

482

483

484

**Figure 2: REAF expression fluctuates in the cell cycle and depletion results in cell accumulation G2/M.** (A) Imaging flow cytometry of cell cycle phase and REAF expression in DAPI stained primary monocytes. (B) REAF expression in HeLa-CD4 over time after release from nocodazole induced cell cycle arrest. Phospho-histone H3 (Ser10/Thr11) is a mitotic marker and GAPDH is a loading control. Cell cycle profiles were determined and accompanying plots are in Figure S1. (C-D) Imaging flow cytometry of subcellular REAF in nocodazole treated HeLa-CD4. A lower nuclear enrichment score indicates a lower proportion of overall REAF in the nucleus - untreated: 0.92, nocodazole-treated: 0.13 (one population), 1.53 (another population) (left). Phospho-histone H3 (Ser28) staining confirmed mitotic cells had a lower score of 0.17 (right). Representative images (D) of subcellular REAF in mitotic and non-mitotic cells. (E) Confocal microscopy of subcellular REAF in HeLa-CD4. Phospho-histone H3 (Ser28) staining and chromatin morphology (Hoechst) were used for cell cycle phase identification. (F) Flow cytometry of cell cycle phase in PI stained HeLa-CD4 shRNA-REAF (black outline) and HeLa-CD4 (grey outline).

485

486

487

488

489

**Figure 3:**

490

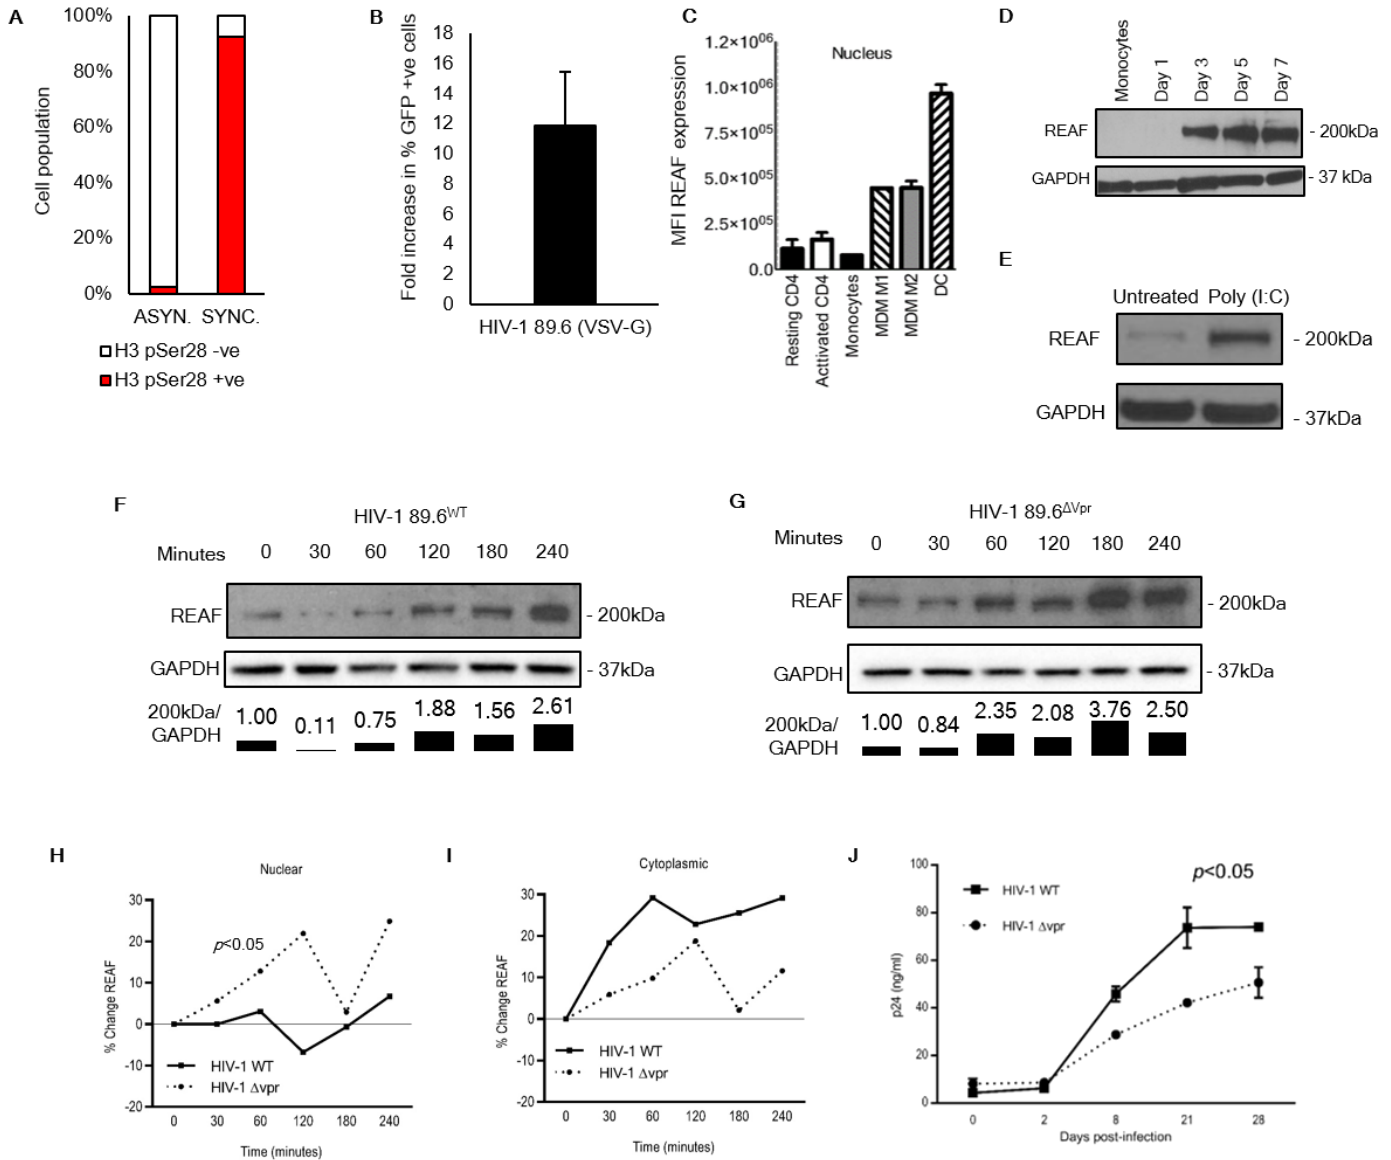

491

492



493

494

**Figure 3: Mitotic cells are more susceptible to HIV-1 infection. Vpr down-modulates REAF in MDMs.** (A, B) Thymidine/nocodazole treated HeLa-CD4 were released from cell cycle arrest at the G2/M border. After 2 hours of cycling into mitosis they, and untreated HeLa-CD4, were challenged in triplicate with HIV-1 89.6 (VSV-G) with a GFP reporter. Flow cytometry confirmed the synchronized population was significantly enriched for mitotic cells at the time of infection (identified using phospho-histone H3 (Ser28)) (A). Fold increase in viral infectivity was assessed 48 hours post challenge by flow cytometry. GFP fluorescence identified infected cells (B). (C) Nuclear expression of REAF in indicated cell types from two blood donors measured by imaging flow cytometry. (D) Western blotting of REAF expression during monocyte to macrophage differentiation with M-CSF. GAPDH is a loading control. (E) REAF protein in poly(I:C) treated, PMA differentiated, THP-1. GAPDH is a loading control. (F, G) MDMs were challenged with HIV-1 89.6<sup>WT</sup> (F) or HIV-1 89.6<sup>Δvpr</sup> (G), harvested at indicated times post challenge, and analyzed for REAF expression. GAPDH is a loading control. Densitometric quantitation of 200kDa REAF is presented. (H, I) MDMs, challenged with HIV-1 89.6<sup>WT</sup> or HIV-1 89.6<sup>Δvpr</sup>, were analyzed by imaging flow cytometry for REAF expression in the nucleus (H) and cytoplasm (I) at the indicated times post challenge. (J) The infectivity of HIV-1 89.6<sup>WT</sup> compared with HIV-1 89.6<sup>Δvpr</sup> in primary human macrophages. Viral input was equivalent at 50ng.

495

**Figure 4:**

**A**

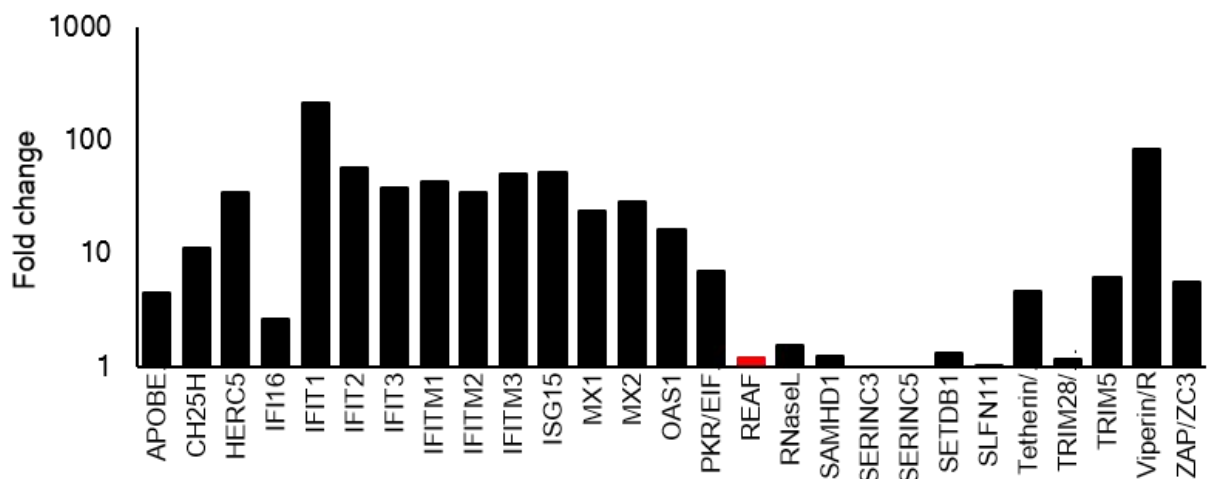

**B**

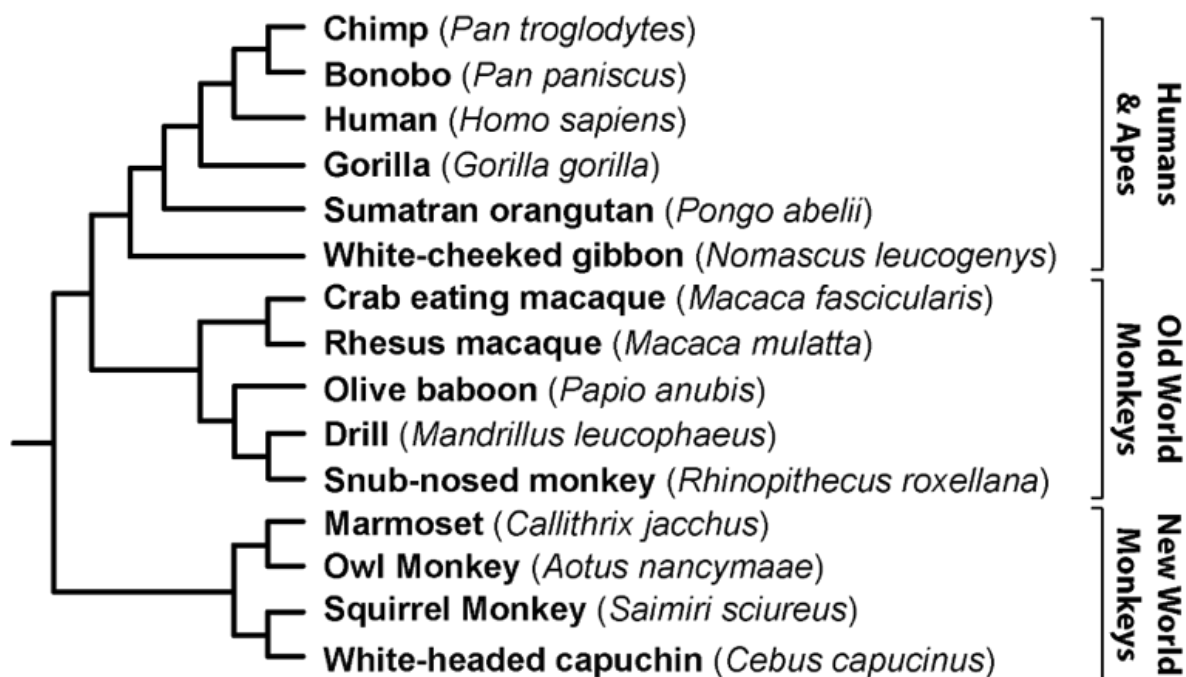

| Codon freq. model | $\omega_0$ | M1 vs M2         |         | M7 vs M8         |         | M8a vs M8        |         |
|-------------------|------------|------------------|---------|------------------|---------|------------------|---------|
|                   |            | $2^*\Delta\ln L$ | p-value | $2^*\Delta\ln L$ | p-value | $2^*\Delta\ln L$ | p-value |
| Fcodon            | 0.4        | 0.67             | 0.72    | 0.95             | 0.62    | 0.67             | 0.41    |
| Fcodon            | 1.2        | 0.67             | 0.72    | 0.95             | 0.62    | 0.67             | 0.41    |
| F3x4              | 0.4        | 0.53             | 0.86    | 0.53             | 0.77    | 0.32             | 0.57    |
| F3x4              | 1.2        | 0.53             | 0.86    | 0.53             | 0.77    | 0.32             | 0.57    |

497

498

499

500

501

**Figure 4: REAF is not IFN stimulated or under positive selection.** (A) RNA-Seq determined change in REAF mRNA compared to other antiviral factors in MDMs treated with IFN $\alpha$  (500IU/ml). (B) REAF DNA sequences from 15 extant primate species (tree length of 0.2 substitutions per site along all branches of the phylogeny) (top) were analysed using the PAML package for signatures of positive natural selection (bottom). Initial seed values for  $\omega$  ( $\omega_0$ ) and different codon frequency models were used in the maximum likelihood simulation. Twice the difference in the natural logs of the likelihoods ( $2 \times \Delta \ln L$ ) of the two models were calculated and evaluated using the chi-squared critical value. The p-value indicates the confidence with which the null model (M1, M7, M8a) can be rejected in favor of the model of positive selection (M2, M8).

502

503

504

505

506

507 **Supporting Information Figures 1 – 6:**

508

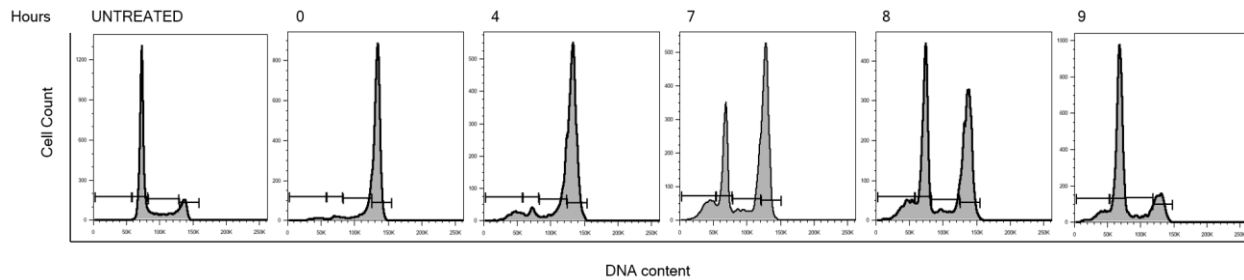

509

510

**Fig. S1. Cell cycle flow cytometry plots accompanying Figure 2B.** HeLa-CD4, synchronized at the G2/M border by treatment with nocodazole, were released from cell cycle arrest and allowed to cycle into mitosis. Cells, harvested over time after release and stained with DAPI, were analyzed for cell cycle phase by flow cytometry.

511

512

513

514

515

516

517

518

519

520

521

522

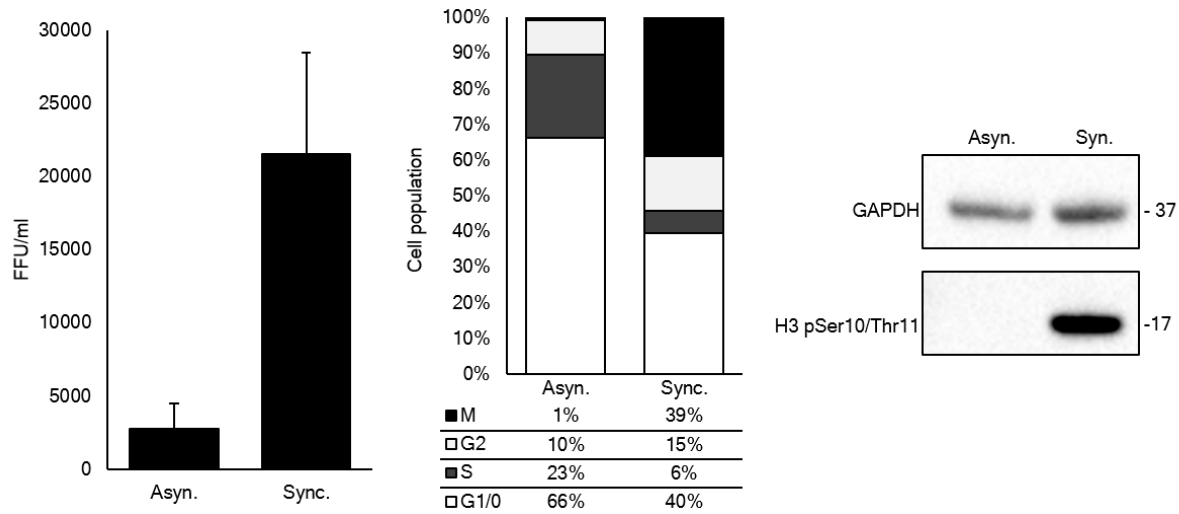

**Fig. S2. Increased susceptibility of mitotic cells to HIV-1.** HeLa-CD4, synchronized at the G2/M border by thymidine/nocodazole treatment, were released from cell cycle arrest and allowed to cycle synchronously into mitosis for 2 hours, at which point they were challenged with HIV-1 89.6<sup>WT</sup>. Asynchronous, untreated HeLa-CD4 were simultaneously infected. Viral infectivity was assessed 48 hours after infection by intracellular staining of HIV-1 p24 to identify focus-forming units (FFUs)(left). Flow cytometry was used to determine cell cycle profiles of cells at the time of infection using DAPI stain to determine DNA content and anti-phospho-histone H3 (Ser28) antibody to identify mitotic cells (center). Western blotting was used to confirm an enriched population of mitotic cells in the synchronized population using phospho-histone H3 (Ser10/Thr11) as an alternative mitotic cell marker and GAPDH as a loading control (right).

523

524

525

**A**

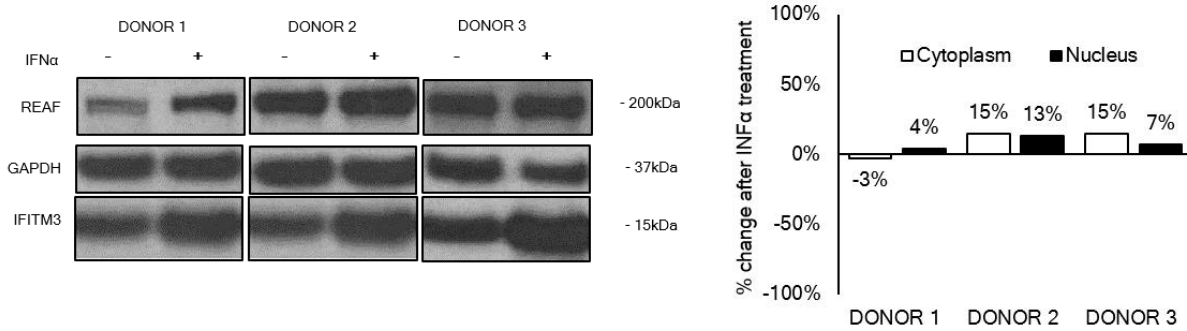

**B**

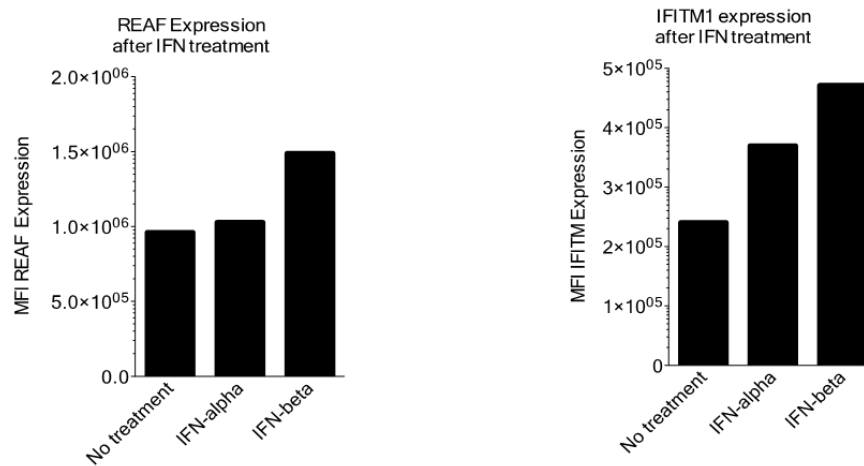

526

**Fig. S3. No IFN induced increase in REAF protein expression or change in subcellular distribution in MDMs. (A)** MDMs of three donors were treated with IFN $\alpha$  (100UI/ml) for 24 hours. Western blotting (left) and imaging flow cytometry (right) were used to determine REAF protein level and subcellular distribution with and without treatment. IFITM3 was used as a positive control for IFN induced protein upregulation and GAPDH as a loading control. **(B)** Imaging flow cytometry of REAF (left) and IFITM1 (right) expression in MDMs from a further donor treated with indicated IFNs (100UI/ml) for 24 hours. Expression of IFITM3 (right) was used as positive control for protein upregulation.

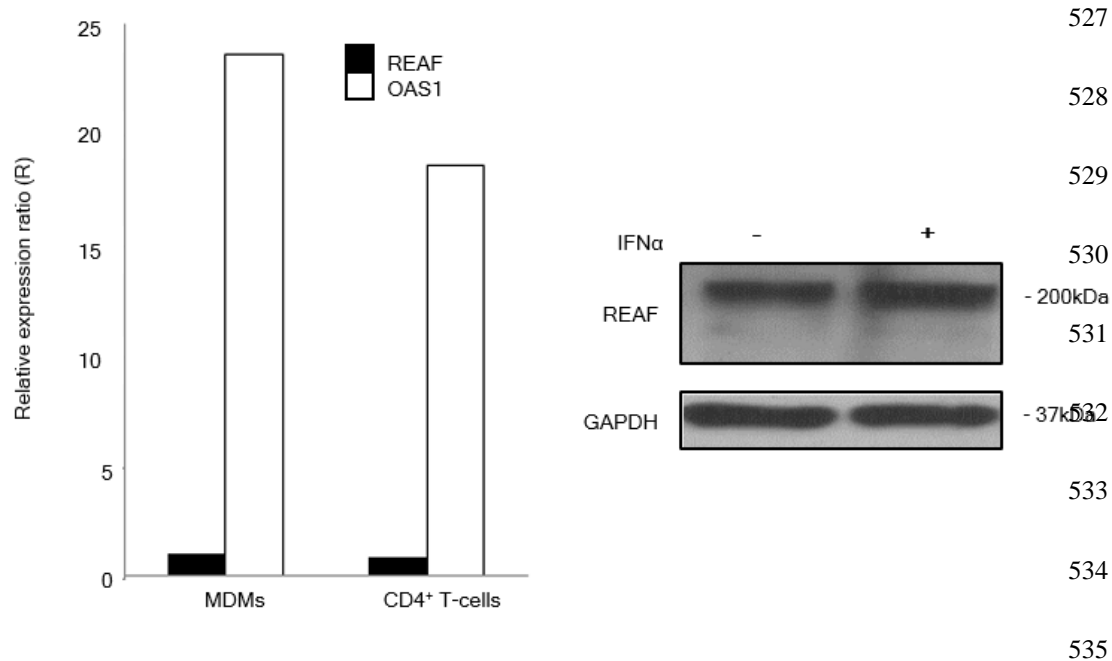

**Fig. S4 No IFN induced upregulation of REAF mRNA in MDMs or CD4<sup>+</sup> T-cells and no protein upregulation in CD4<sup>+</sup> T-cells.** MDMs and primary CD4<sup>+</sup> T-cells were treated with IFN $\alpha$  (500IU/ml) for 48 hours. Increase in REAF mRNA, relative to that of  $\beta$ -actin, was measured by qPCR and OAS1 was used as a positive control for IFN induced upregulation (left). REAF protein expression (right) was also measured in CD4<sup>+</sup> T-cells by Western blotting with GAPDH as a loading control.

536

537

538

539

540

541

542

543

544

545

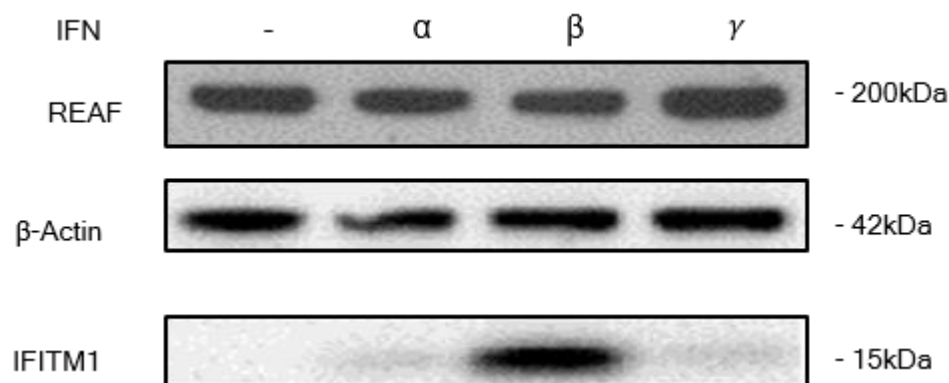

546

547

548

**Fig. S5. No upregulation of REAF protein expression in IFN treated PMA differentiated THP-1.** PMA differentiated THP-1 were analyzed by Western blotting after treatment with indicated IFNs (100IU/ml) for 24 hours. 200 and 80kDa bands are indicated, not all REAF bands are detected in all experiments. IFITM1 was used as a positive control for IFN induced protein upregulation and β-Actin as a loading control.

549

550

551

552



553

554

555

556

557

558

559

560

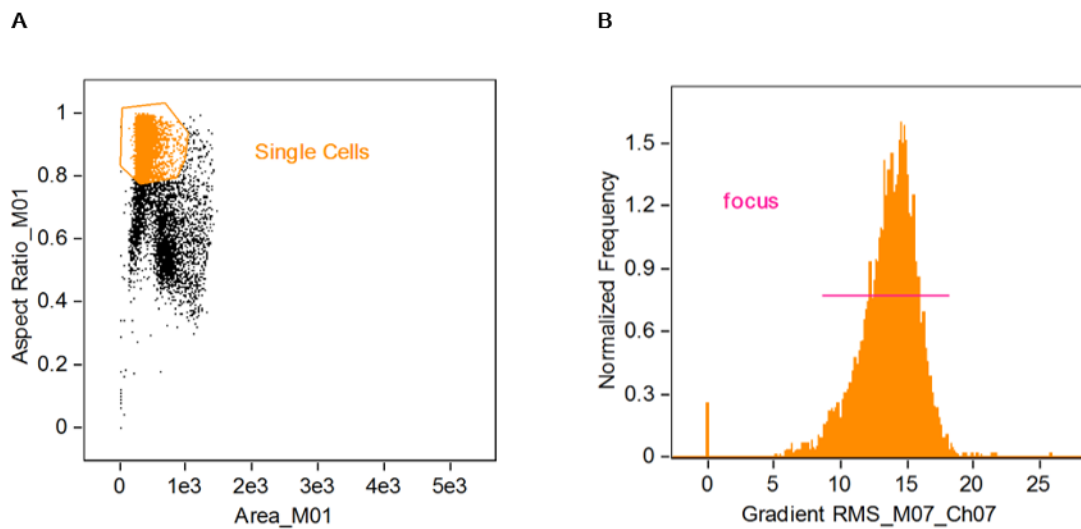

**Fig. S6. Sequential gating strategy used in imaging flow cytometry analysis with IDEAS software. (A)** Single cells were gated by area versus aspect ratio of the brightfield cell images. **(B)** Cells with in focus images were gated by gradient RMS (root mean square of the rate of change of the image intensity profile). Representative plot examples are shown.
